# Supplementary material
Source: PubMed Central journal article supplement (PMC3822730)
Supplement: jcmm0014-2803-SD2.pdf [file jcmm0014-2803-SD2.pdf]

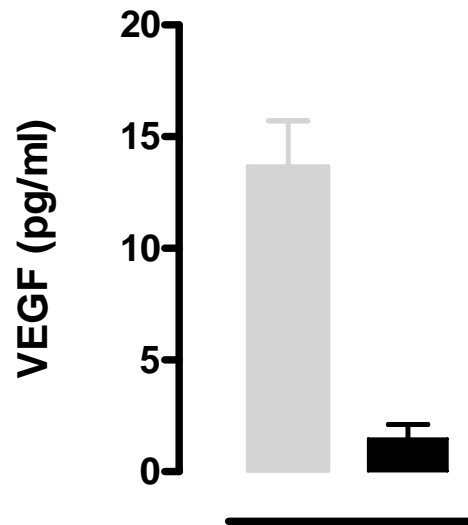

Decreased vascular endothelial growth factor (VEGF) serum levels in ZA-treated mice. The levels of circulating VEGF were assessed in sera of control and ZA-treated mice 1 week after the second ZA course. ZA-treated mice (solid bar, n=7) show significantly lower serum VEGF levels than control mice (grey bar, n=5) ( $p=0.03$ , Student's t Test). Results are expressed as mean values  $\pm$  SEM.
